# Supplementary material for: Evaluation of Recombinant Human FGF-2 and PDGF-BB in Periodontal Regeneration: A Systematic Review and Meta-Analysis
Source: PubMed Central journal article supplement (PMC5427916; doi:10.1038/s41598-017-00113-y), 2017-03-06
Supplement: 41598_2017_113_MOESM1_ESM.pdf [file 41598_2017_113_MOESM1_ESM.pdf]

## **Evaluation of Recombinant Human FGF-2 and PDGF-BB in Periodontal Regeneration: A Systematic Review and Meta-Analysis**

**Li Feifei<sup>1,2\*</sup>, Yu Fanyuan<sup>1,2\*</sup>, Xu Xin<sup>1,2</sup>, Li Chunjie<sup>1,2</sup>, Huang Dingming<sup>1,2</sup>, Zhou Xuedong<sup>1,2</sup>, Ye Ling<sup>1,2#</sup>, Zheng Liwei<sup>1,2#</sup>**

1. State Key Laboratory of Oral Diseases, National Clinical Research Center for Oral Diseases, West China Hospital of Stomatology, Sichuan University, Chengdu, China
2. West China School of Stomatology, Sichuan University, Chengdu, China

\* Li Feifei, Yu Fanyuan contributed equally to this work.

# Corresponding authors: Zheng Liwei and Ye Ling

Zheng Liwei: DDS, PhD, State Key Laboratory of Oral Diseases, National Clinical Research Center for Oral Diseases, West China Hospital of Stomatology, Sichuan University, No.14, Section 3, South Renmin Road, Chengdu, China, 610041.

Telephone: 862885503469

Fax: 862885582167

E-mail: [liweizheng@scu.edu.cn](mailto:liweizheng@scu.edu.cn)

Ye Ling: DDS, PhD, Department of Endodontics, West China Hospital of Stomatology, Sichuan University, No.14, Section 3, South Renmin Road, Chengdu, China, 610041.

Telephone: 862885503497

Fax: 862885582167

E-mail: [yeling@scu.edu.cn](mailto:yeling@scu.edu.cn)

## Supplemental Data

S1

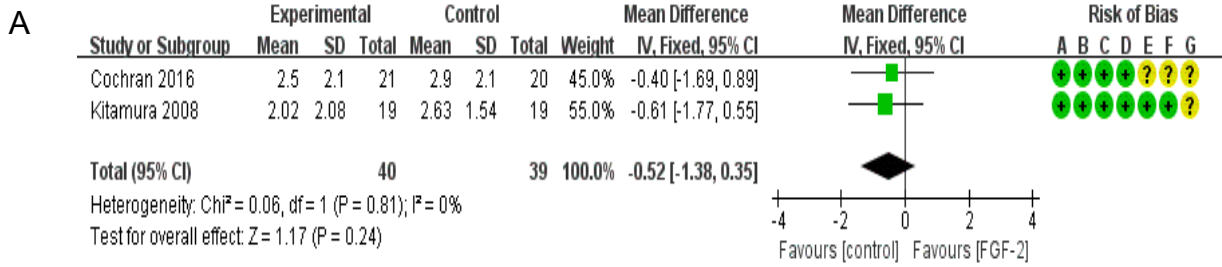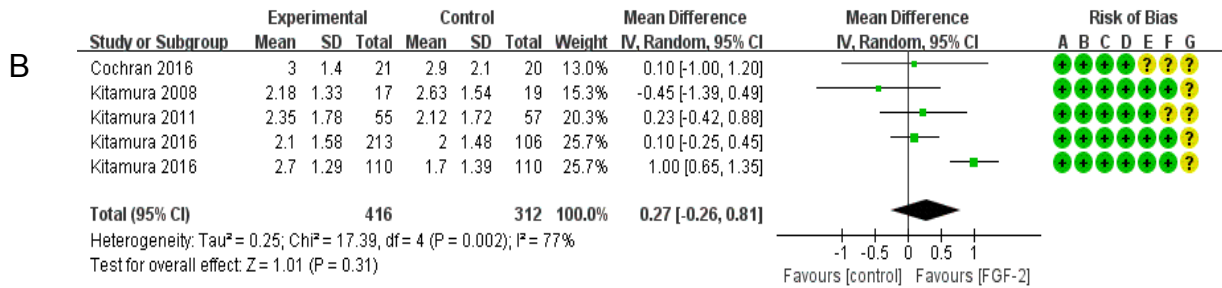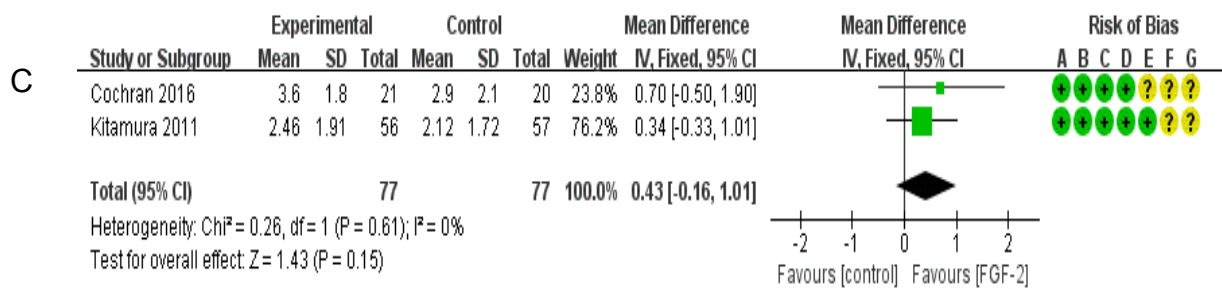

S1A. Forest plot of comparison: 0.1% FGF2 groups was compared with control groups among patients with osseous defects, outcome: CAL-G.

S1B. Forest plot of comparison: 0.3% FGF2 groups was compared with control groups among patients with osseous defects, outcome: CAL-G.

S1C. Forest plot of comparison: 0.4% FGF2 groups was compared with control groups among patients with osseous defects, outcome: CAL-G.

A

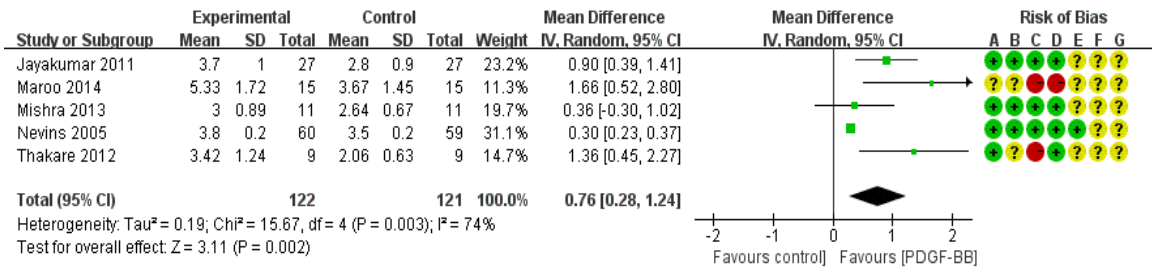

B

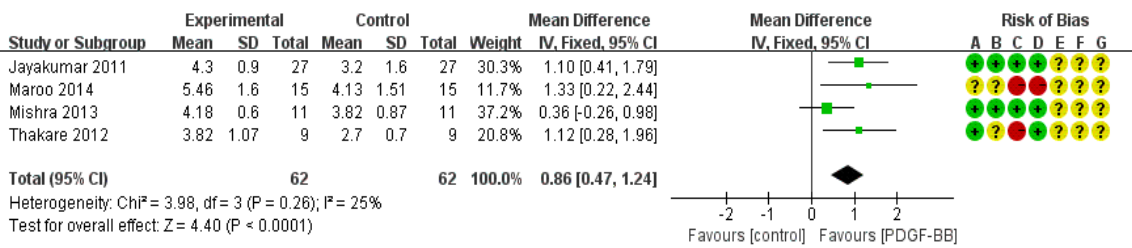

S2A. Forest plot of comparison: 0.3mg/ml PDGF-BB groups was compared with control groups among patients with osseous defects, outcome: CAL-G.

S2B. Forest plot of comparison: 0.3mg/ml PDGF-BB groups was compared with control groups among patients with osseous defects, outcome: PDR.

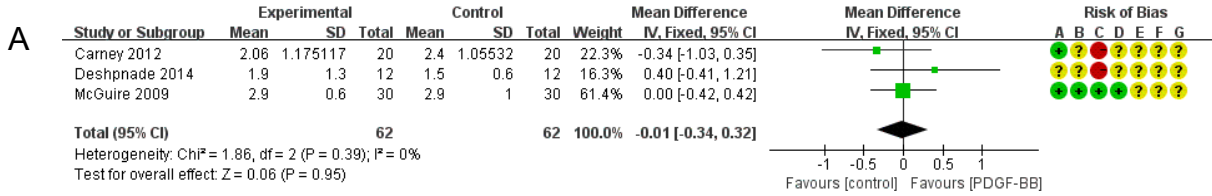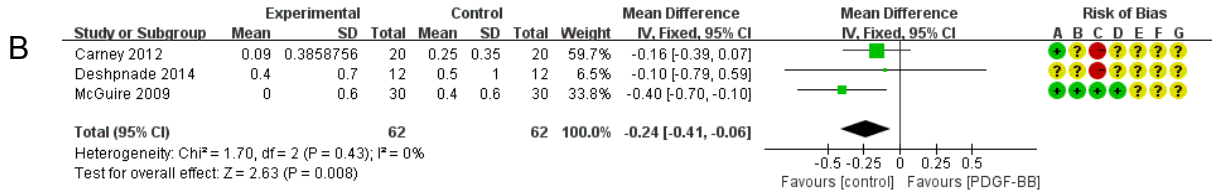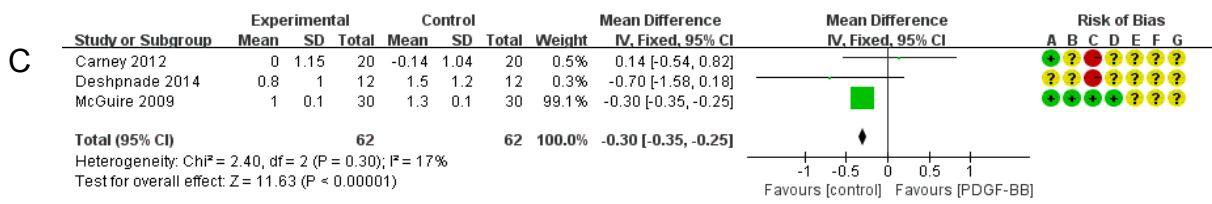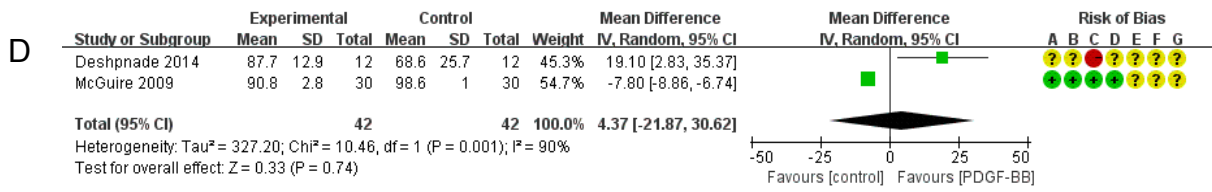

S3A. Forest plot of comparison: 0.3mg/ml PDGF-BB groups was compared with control groups among patients with gingival recession, outcome: CAL-G.

S3B. Forest plot of comparison: 0.3mg/ml PDGF-BB groups was compared with control groups among patients with gingival recession, outcome: PDR.

S3C. Forest plot of comparison: 0.3mg/ml PDGF-BB groups was compared with control groups among patients with gingival recession, outcome: WKT

S3D. Forest plot of comparison: 0.3mg/ml PDGF-BB groups was compared with control groups among patients with gingival recession, outcome: PRC..
